# Supplementary material for: Life and Death of Immature Neurons in the Juvenile and Adult Primate Amygdala
Source: MDPI journal article supplement (doi:10.3390/ijms22136691), 2021-06-22
Supplement: s1 [file s1]

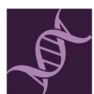

**Table S1.** Neuron numbers and volumes of the main amygdala nuclei in rhesus monkeys: juvenile controls, adult controls, and adults subjected to early or late hippocampus lesion (mean  $\pm$  SD).

|                                  | Immature neurons        | Mature neurons       |                         |                         | Volume (mm <sup>3</sup> ) |                |                |
|----------------------------------|-------------------------|----------------------|-------------------------|-------------------------|---------------------------|----------------|----------------|
|                                  | Paralaminar             | Paralaminar          | Lateral                 | Basal                   | Paralaminar               | Lateral        | Basal          |
| Juvenile control ( $n = 20$ )    | 1,000,953 $\pm$ 202,326 | 61,275 $\pm$ 22,351  | 1,742,168 $\pm$ 249,743 | 1,286,503 $\pm$ 143,988 | 4.0 $\pm$ 1.3             | 32.3 $\pm$ 5.1 | 34.3 $\pm$ 6.7 |
| Adult control ( $n = 7$ )        | 498,210 $\pm$ 82,884    | 407,123 $\pm$ 37,270 | 1,706,444 $\pm$ 178,120 | 1,573,016 $\pm$ 212,939 | 7.9 $\pm$ 0.8             | 35.6 $\pm$ 5.0 | 43.7 $\pm$ 5.2 |
| Adult late-lesioned ( $n = 6$ )  | 364,684 $\pm$ 91,012    | 670,142 $\pm$ 69,897 | 1,847,354 $\pm$ 340,830 | 1,470,181 $\pm$ 353,532 | 10.0 $\pm$ 0.9            | 37.9 $\pm$ 6.2 | 44.1 $\pm$ 8.9 |
| Adult early-lesioned ( $n = 8$ ) | 686,313 $\pm$ 85,446    | 700,264 $\pm$ 27,369 | 2,454,814 $\pm$ 247,625 | 2,125,273 $\pm$ 395,511 | 9.9 $\pm$ 0.7             | 38.6 $\pm$ 5.4 | 48.2 $\pm$ 7.6 |

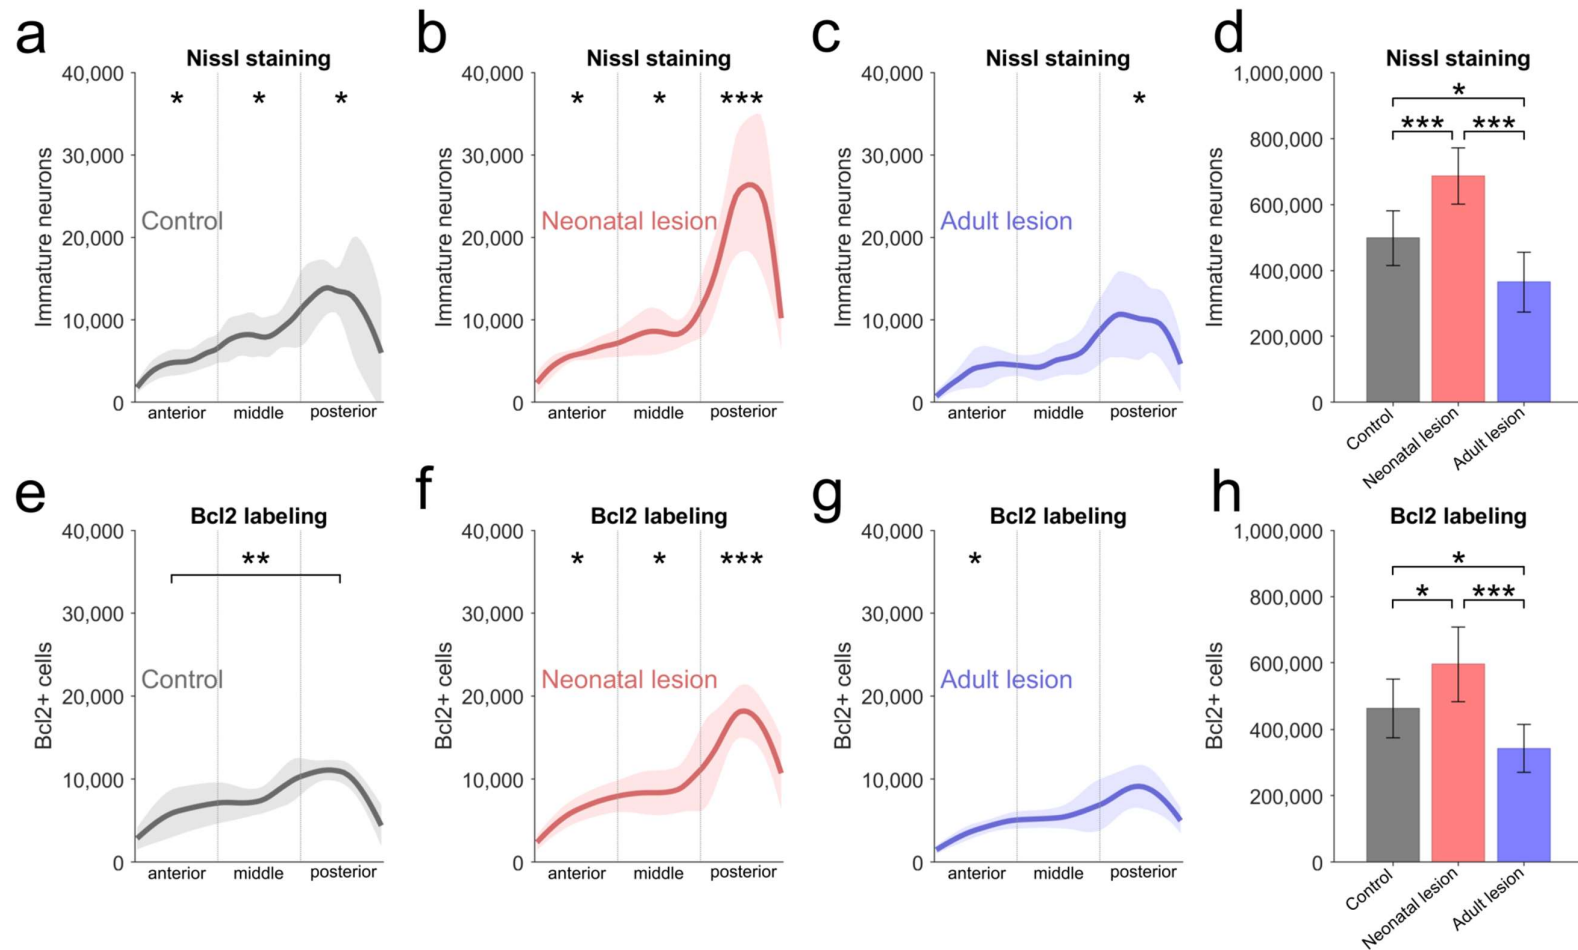

**Figure S1.** Anteroposterior distributions and numbers of immature neurons and Bcl2+ cells in the paralamina nucleus of the adult monkey. Stereological estimates of the number of immature neurons based on Nissl-stained (a–d) or Bcl2-immunolabeled (e–h) brain sections. Unoperated control ( $n = 7$ ; grey; a, e), neonatal hippocampus-lesioned ( $n = 8$ ; red; b, f), and adult hippocampus-lesioned ( $n = 6$ ; blue; c, g). Comparison of the number of cells between the three anteroposterior segments (a–c, e–g) (asterisk positioned above a single segment means that this set of values is significantly different from the other two segments). Comparison of the number of cells between experimental groups (d, h). Average  $\pm$  SD; \* $p < 0.05$ ; \*\* $p < 0.01$ ; \*\*\* $p < 0.001$ .
